# Supplementary material for: High-fat diet supplemented with soybean diacylglycerol oil protects liver homeostasis via maintaining endoplasmic reticulum function in C57BL/6J mice
Source: Royal Society of Chemistry journal article supplement (doi:10.1039/d3fo04374f), 2025-01-01
Supplement: d3fo04374f2.pdf [file d3fo04374f2.pdf]

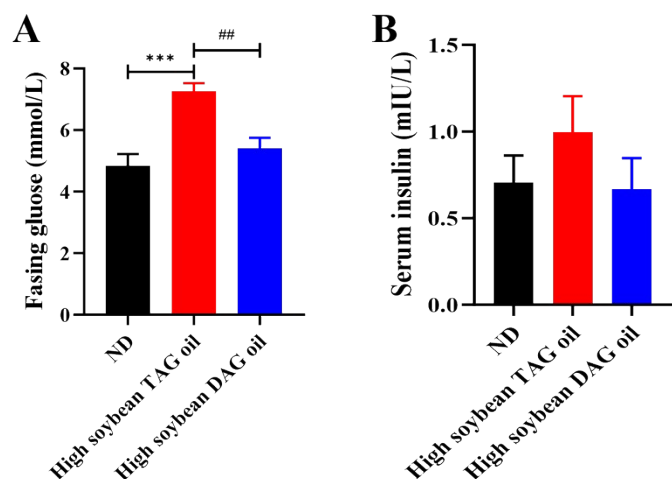

Fig. S1. The levels of fasting blood glucose and serum insulin, related to Fig. 2. (A) Fasting glucose level; (B) Serum insulin level. Data were presented as mean  $\pm$  SEM, \*\*\* $p$ <0.001 versus the ND group, ## $p$ <0.01 versus the High soybean TAG oil group.

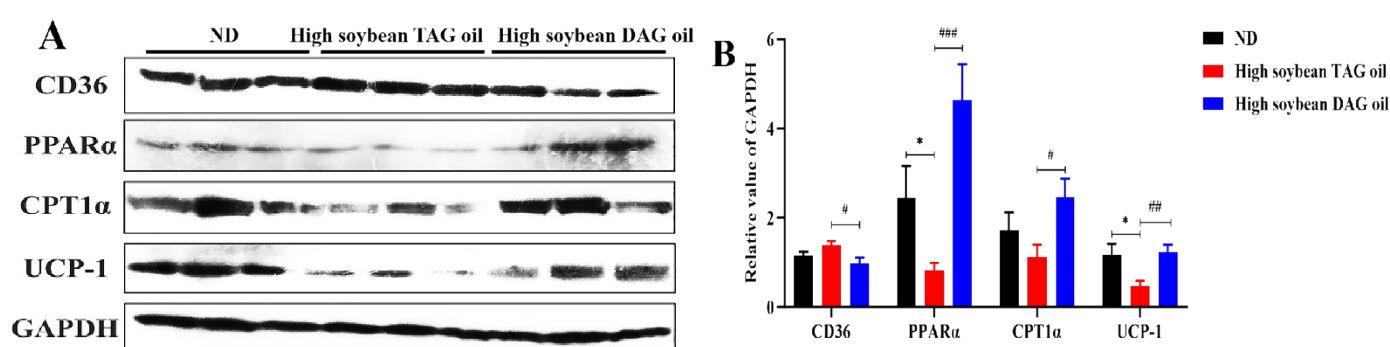

Fig. S2. The expression levels of hepatic proteins involving in lipid transport and fatty acid oxidation, related to Fig. 2. (A) Western blot ( $n=3$ ) and (B) quantification ( $n=6$ ) of total protein levels of CD36, PPAR $\alpha$ , CPT1 $\alpha$  and UCP-1 in mouse liver. Data were presented as mean  $\pm$  SEM, \* $p$ <0.05 versus the ND group, # $p$ <0.05, ## $p$ <0.01 and ### $p$ <0.001 versus the High soybean TAG oil group.

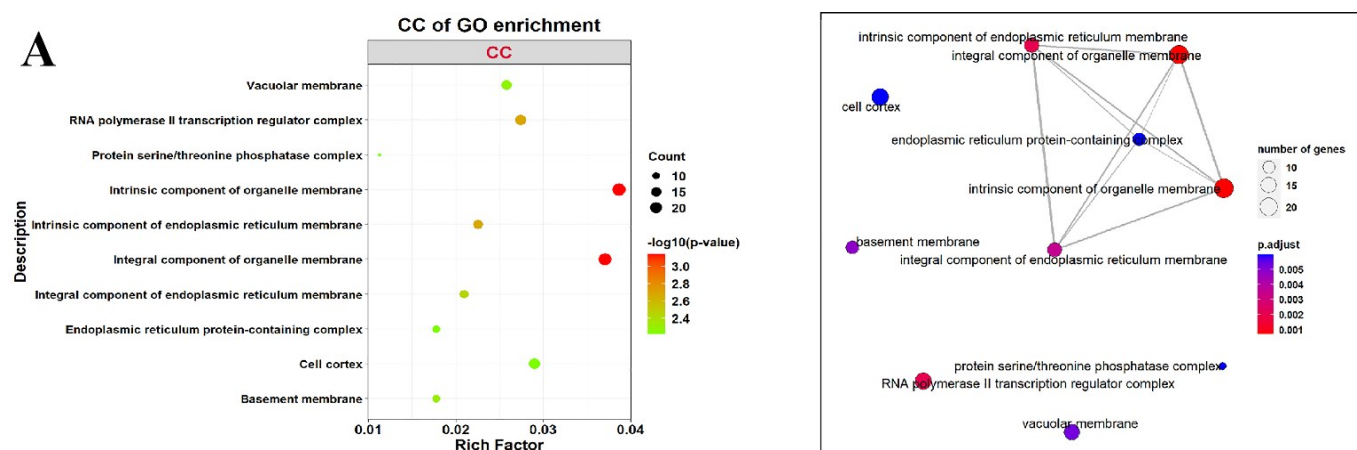

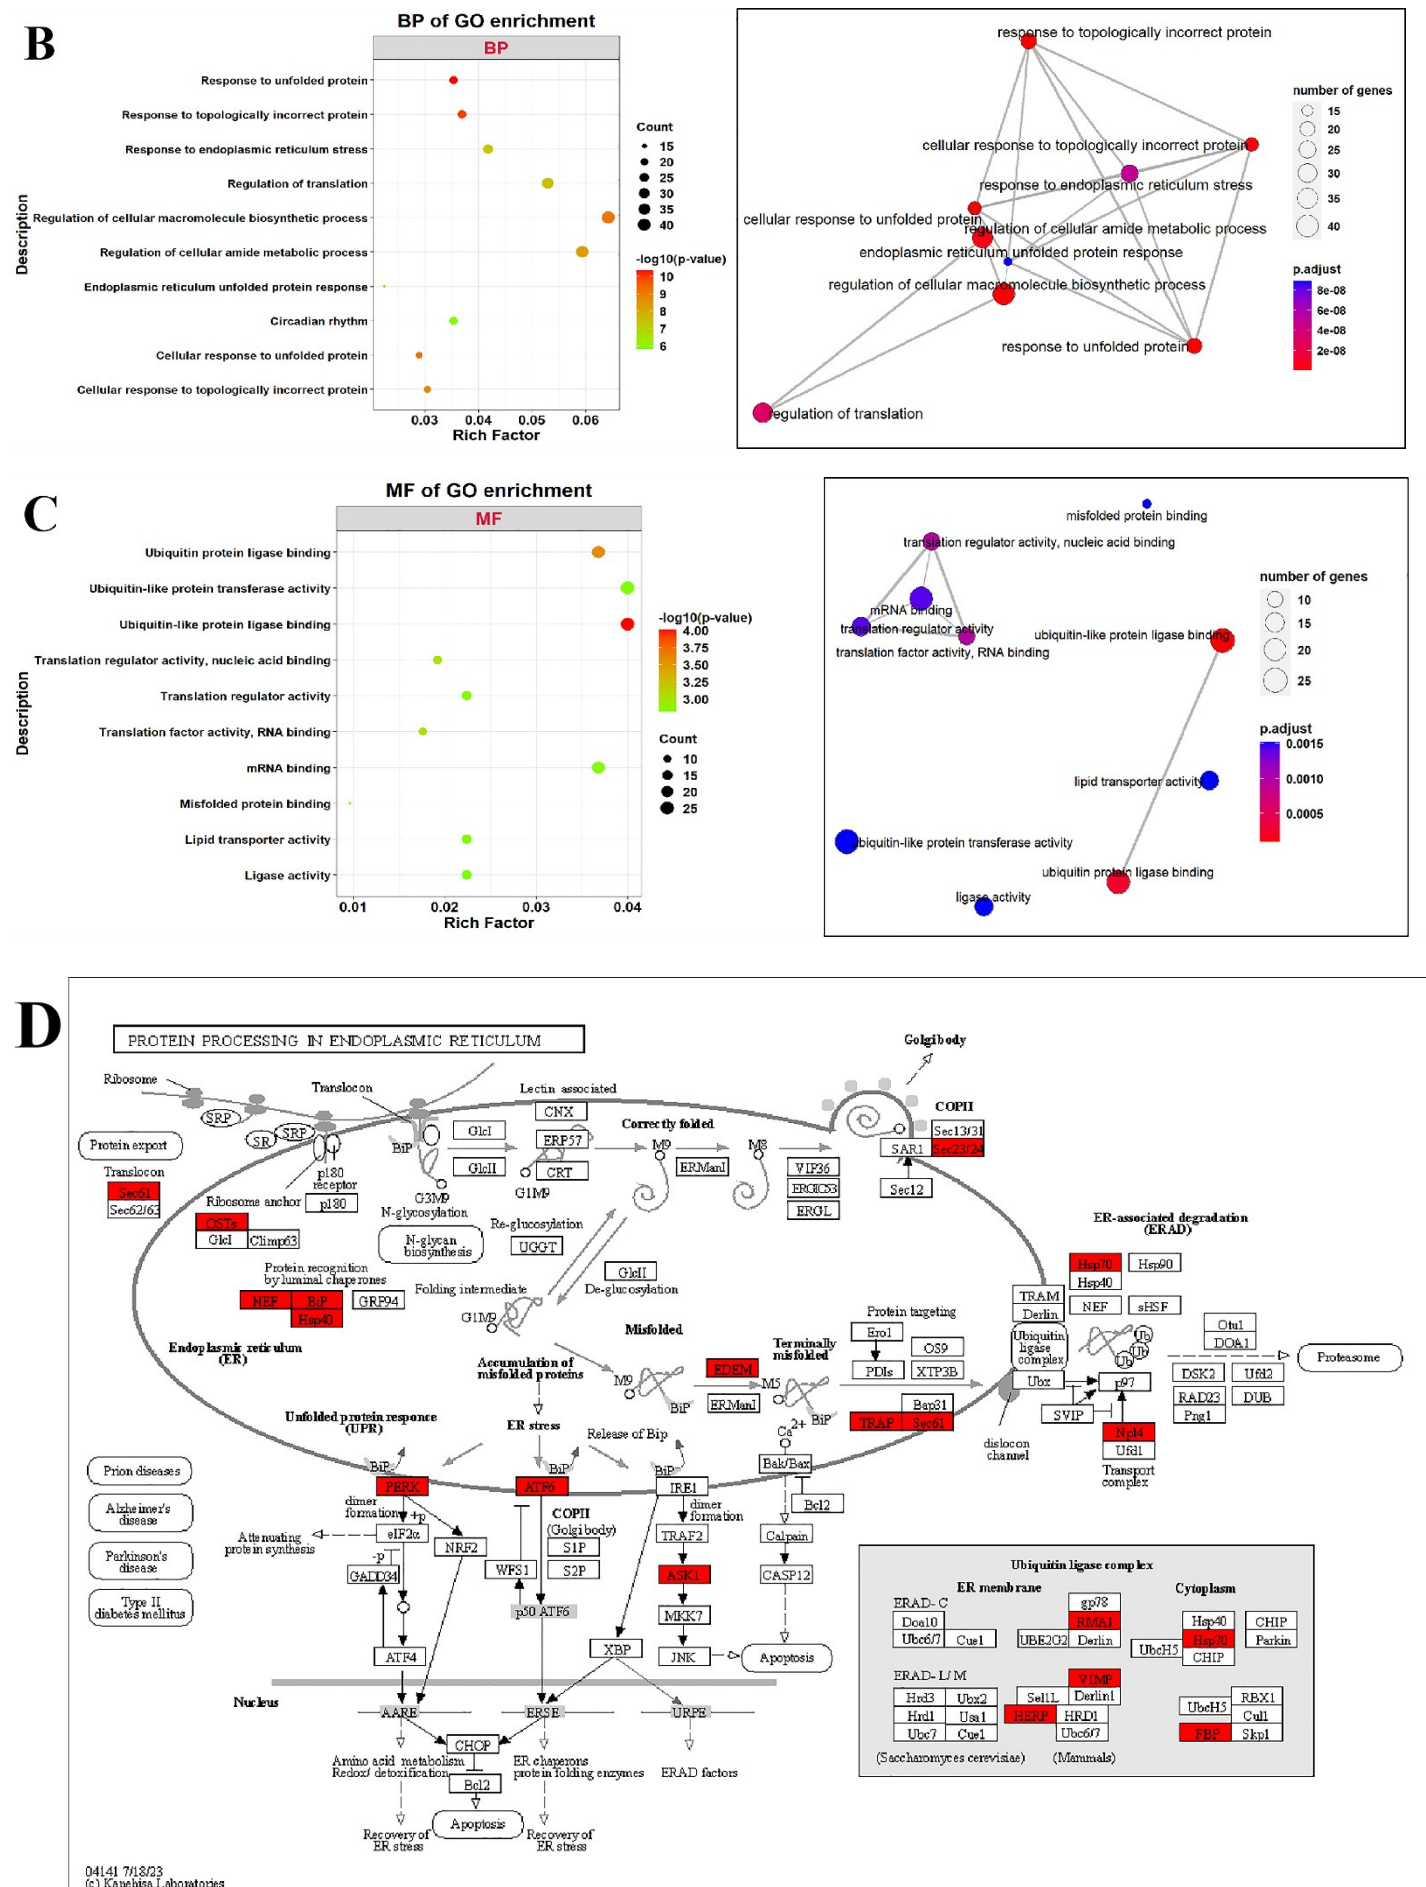

Fig. S3. The classification of GO enrichment, related to Figure 4. (A) The CC of GO enrichment; (B) The BP of GO enrichment; (C) The MF of GO enrichment; (D) The pathway of protein process in ER (Red represent a significant increase in High soybean DAG oil group vs High soybean TAG oil group). Data was presented in High soybean DAG oil group vs High soybean TAG oil group.
